# Supplementary material for: Improving high-rate performance of mesoporous Li2FeSiO4/Fe7SiO10/C nanocomposite cathode with a mixed valence Fe7SiO10 nanocrystal
Source: Royal Society of Chemistry journal article supplement (doi:10.1039/c3ta14800a), 2014-01-01
Supplement: c3ta14800a.pdf [file c3ta14800a.pdf]

## Supplementary Information

### Improving high rate performance of mesoporous $\text{Li}_2\text{FeSiO}_4/\text{Fe}_7\text{SiO}_{10}/\text{C}$ nanocomposite cathode with a mixed valence $\text{Fe}_7\text{SiO}_{10}$ nanocrystal

Donglin Li\*, Rong Xie, Miao Tian,, Qian Li, Shoulong Ma, Lei Gou, Xiaoyong Fan, Peng Zhao, Yongxin Shi, Hong-Tuan-Hua Yong, Limin Hao

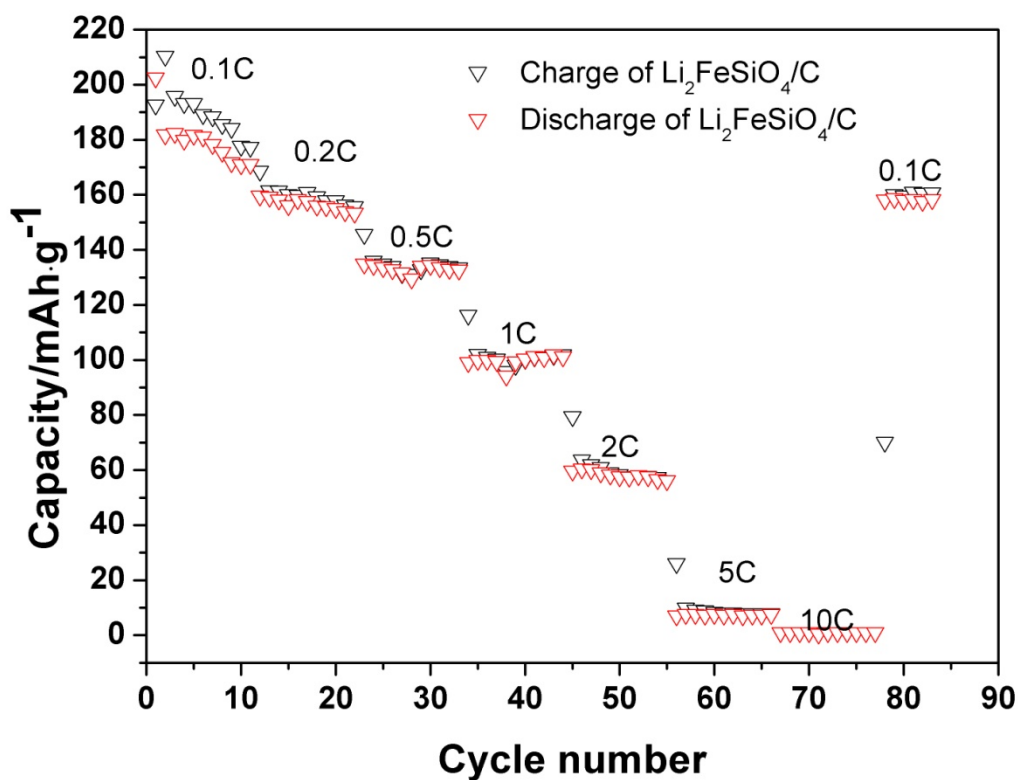

**Fig. S1.** Cycling performance of the bulk  $\text{Li}_2\text{FeSiO}_4/\text{C}$  particles with an average of 80 nm in diameter at different rates between 1.5 ~ 4.5V

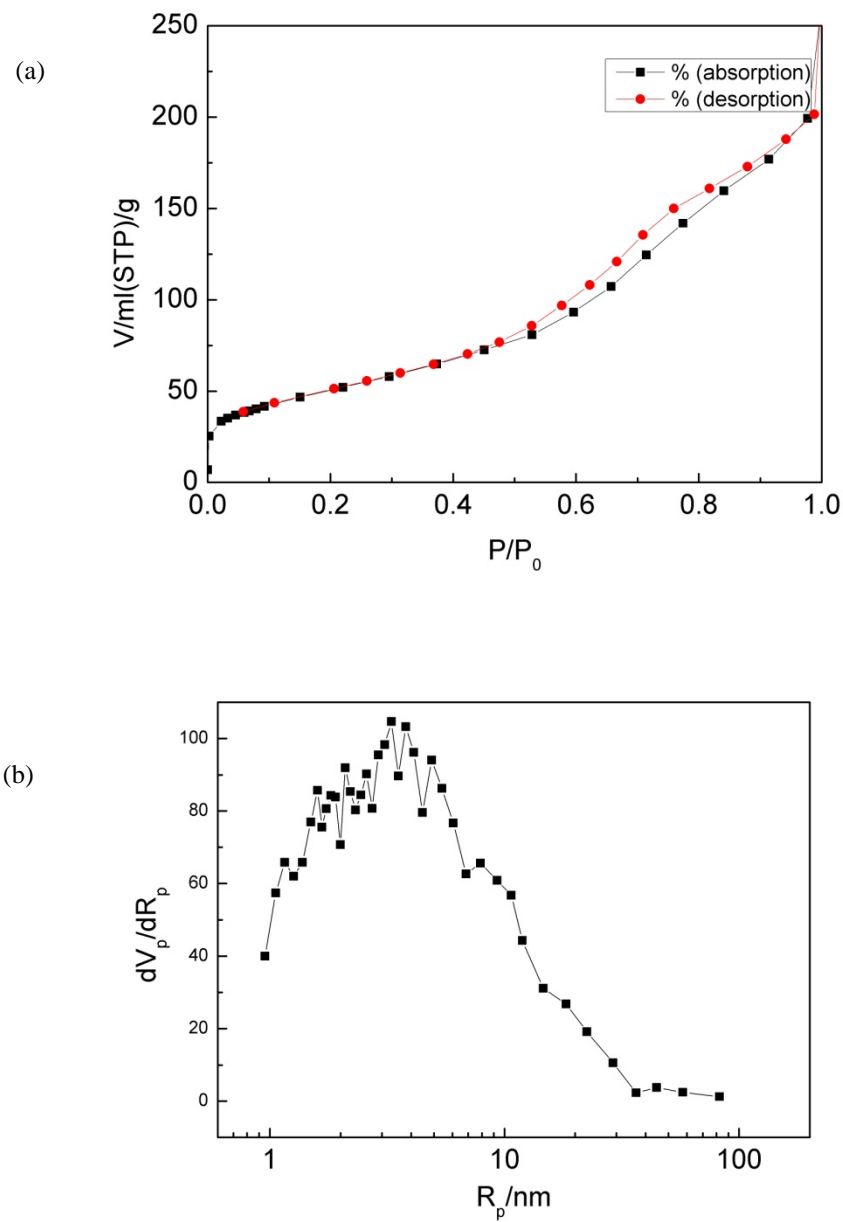

**Fig. S2** (a) Nitrogen absorption–desorption isotherms and (b) pore-size distribution plots for  $\text{Li}_2\text{FeSiO}_4/\text{Fe}_7\text{SiO}_{10}/\text{C}$  nanocomposite.
